# Supplementary material for: Clinical characteristics and prognosis of non-APAP drug-induced acute liver failure: a large multicenter cohort study
Source: Springer Nature journal article supplement (doi:10.1007/s12072-023-10541-w), 2023-05-19

Supplementary Figure 1 Implicated drugs in this study.

† excluding anti-tuberculosis drugs ‡ excluding tuberculosis

HDS, herbal and dietary supplements; APAP, acetaminophen.

A

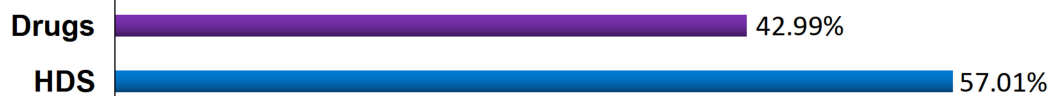

B

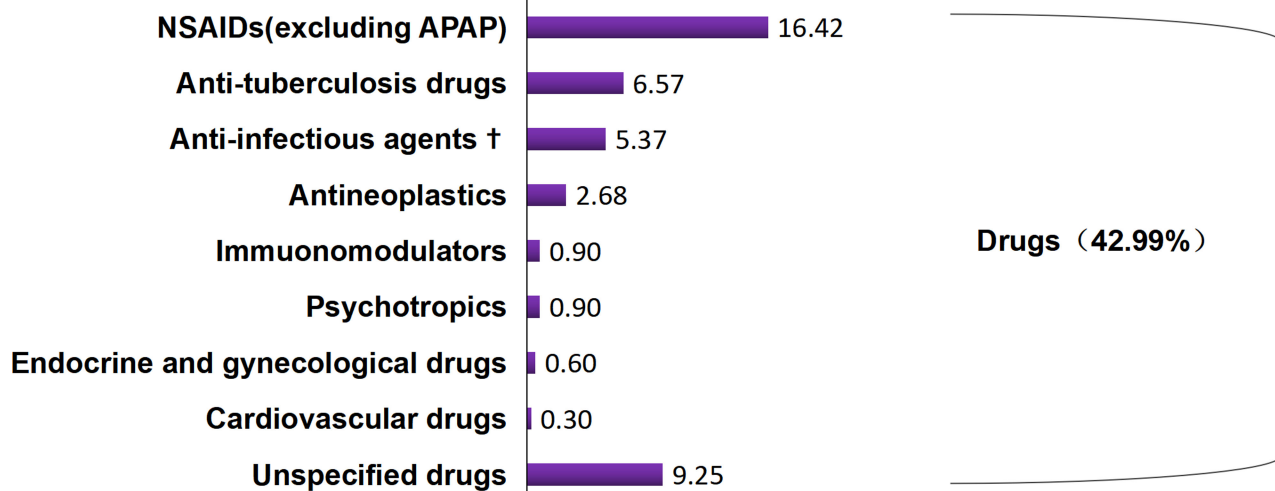

C

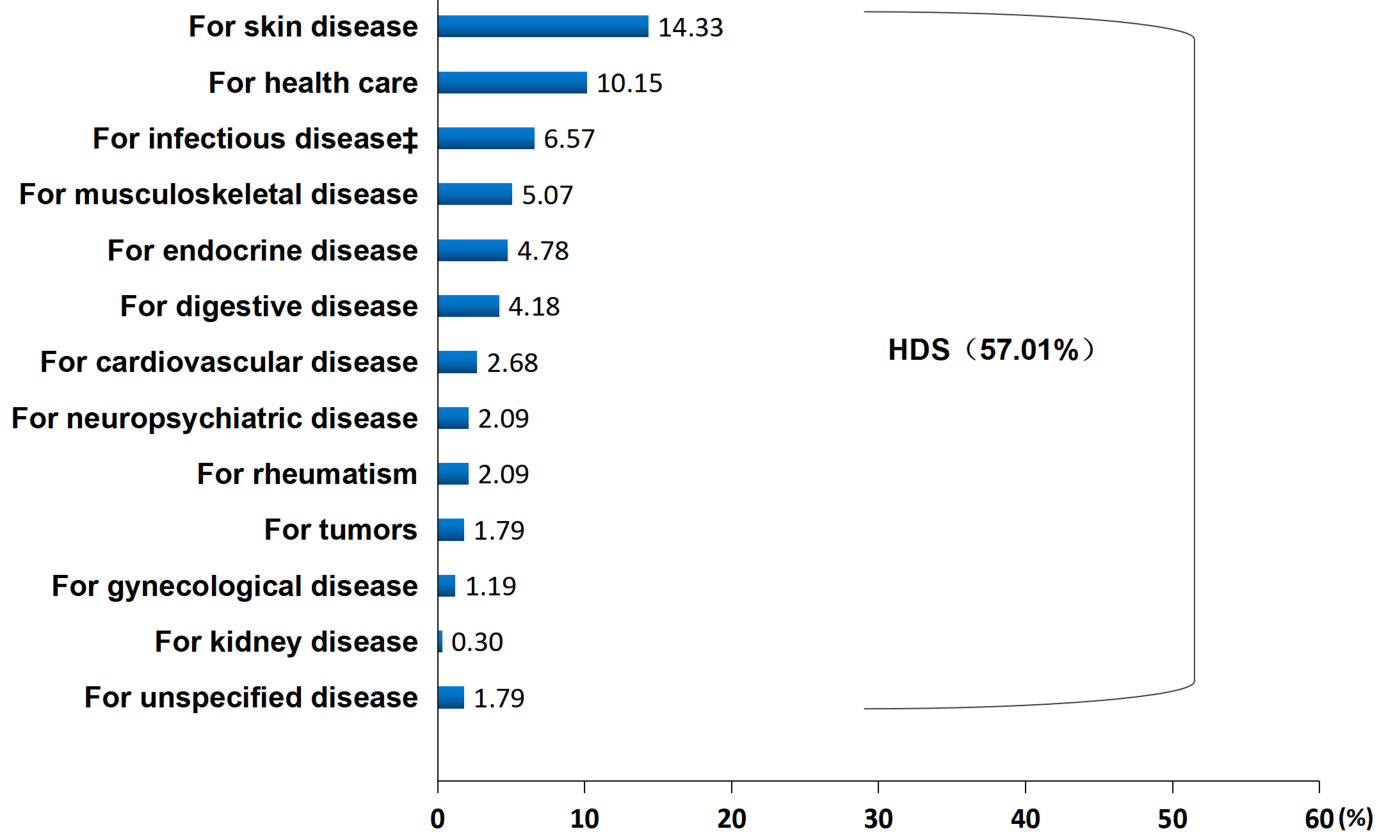

Supplement: MOESM1 [file 12072_2023_10541_MOESM1_ESM.pdf]
